# Supplementary material for: Synthesis, crystal structure, magnetic and luminescence properties of KEuGe2O6: a europium cyclogermanate containing infinite chains of edge-sharing Eu–O polyhedra
Source: Royal Society of Chemistry journal article supplement (doi:10.1039/b716654k), 2008-01-01
Supplement: b716654k.pdf [file b716654k.pdf]

## Supporting Information

# Synthesis, Crystal Structure, Magnetic and Luminescence Properties of $\text{KEuGe}_2\text{O}_6$ : A Europium Cyclogermanate Containing Infinite Chains of Edge-Sharing Eu-O Polyhedra

Pei-Lin Chen,<sup>a</sup> Pei-Yun Chiang,<sup>a</sup> Han-Ching Yeh,<sup>a</sup> Bor-Chen Chang,<sup>a,\*</sup> and Kwang-Hwa

Lii<sup>a,b,\*</sup>

<sup>a</sup>*Department of Chemistry, National Central University, Chungli, Taiwan, R.O.C.*

<sup>b</sup>*Institute of Chemistry, Academia Sinica, Taipei, Taiwan, R.O.C.*

Table S1. Experimental (bottom) and simulated (top) X-ray powder patterns for  $\text{KEuGe}_2\text{O}_6$

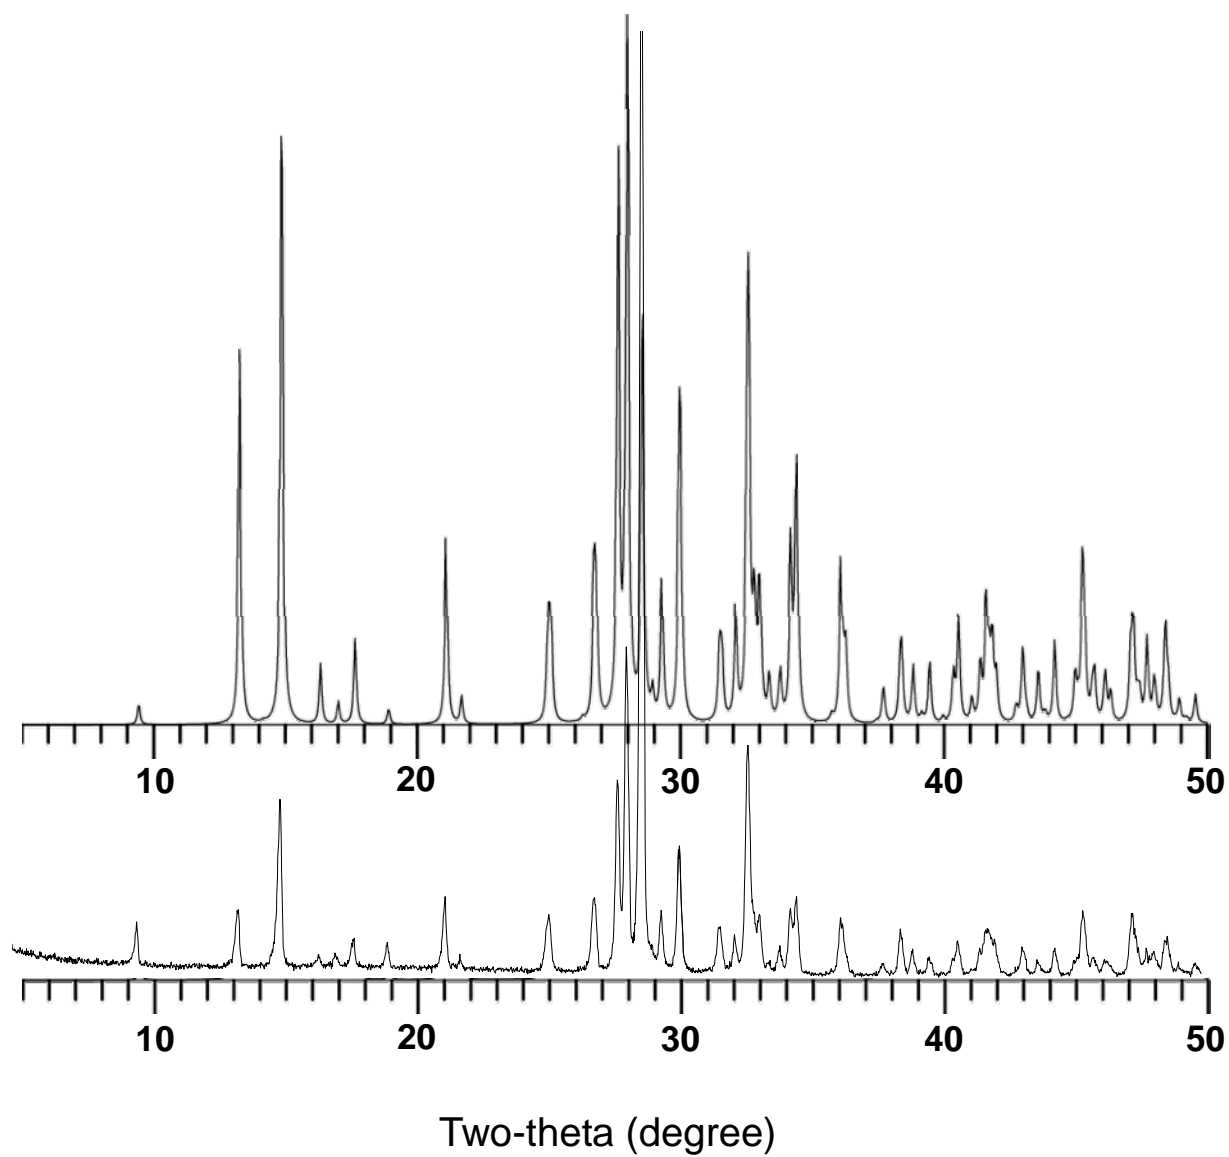

Figure S1
